# Supplementary material
Source: PubMed Central journal article supplement (PMC1887598)

### Early pachytene spermatocytes (A, F)

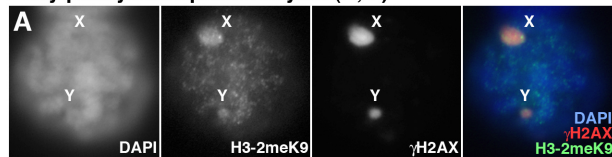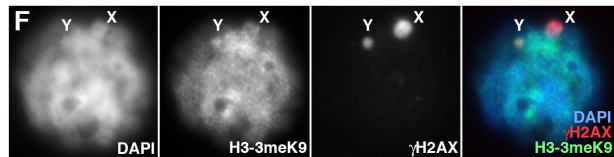

### Mid pachytene to diplotene spermatocytes (B, G)

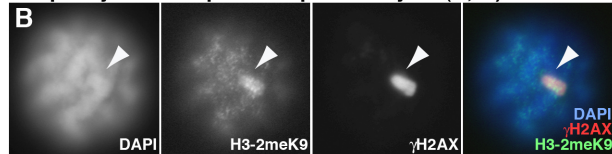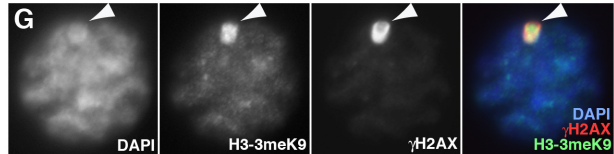

### Secondary spermatocytes (C, H)

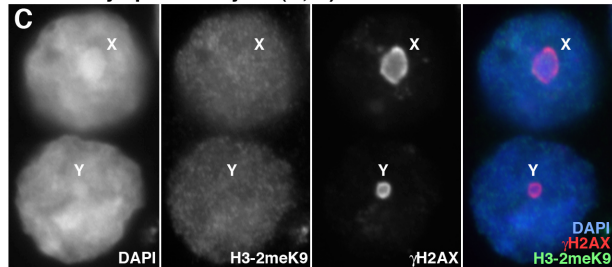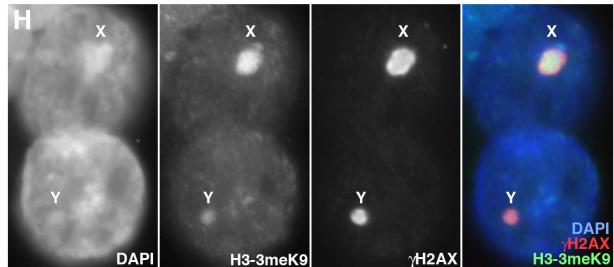

### Round spermatides (D, E, I, J)

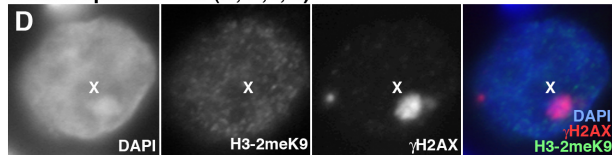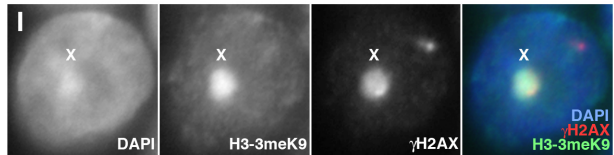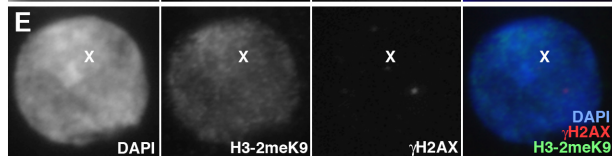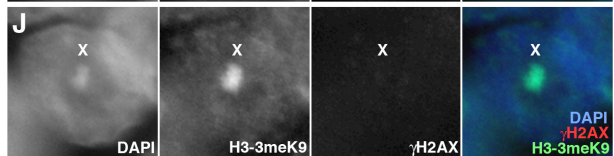

Supplement: pnas_0700323104_4.pdf [file pnas_0700323104_4.pdf]
