# Supplementary material
Source: PubMed Central journal article supplement (PMC1887598)

# Diplotene

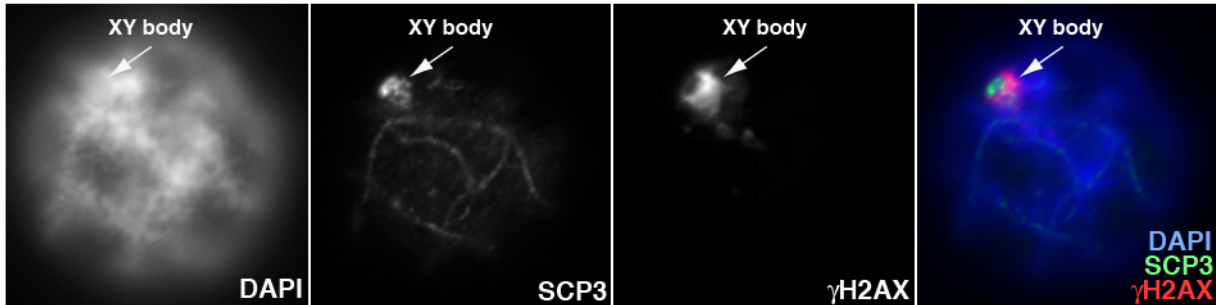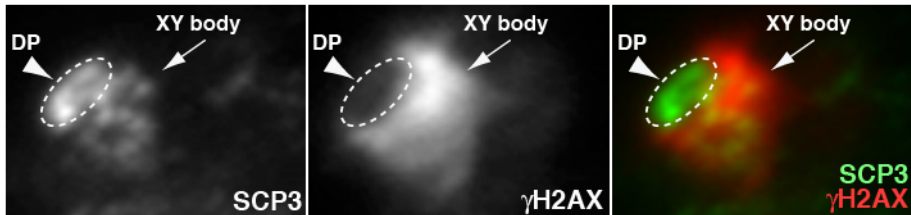

Supplement: pnas_0700323104_2.pdf [file pnas_0700323104_2.pdf]
